# Supplementary material
Source: Springer Nature journal article supplement (https://www.springermedizin.de/resource/supplementary/12967_2010_671_MOESM4_ESM.pdf/9577074)

# Glomerular degeneration and glomerulosclerosis in CKD

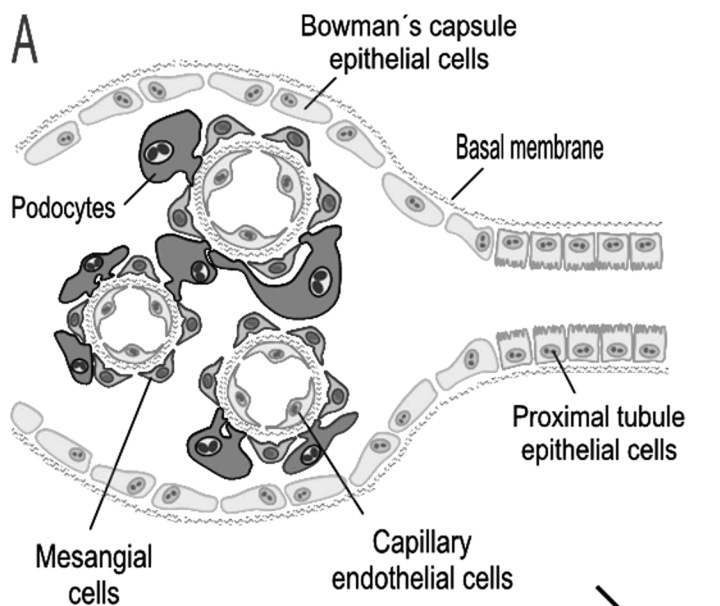

Initial damage

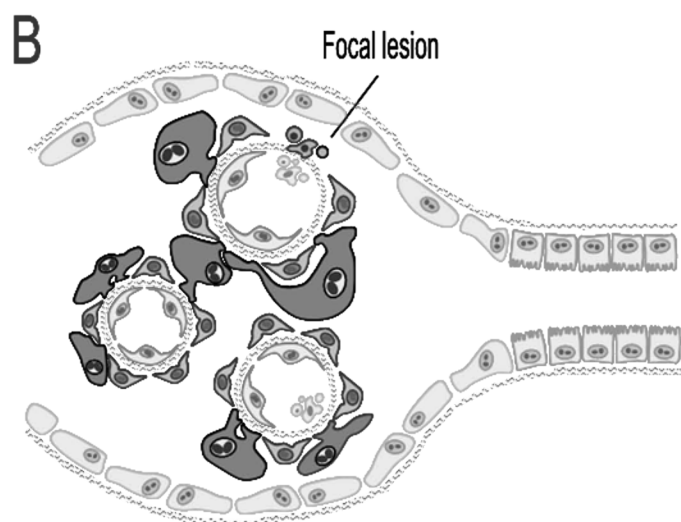

Pathological response

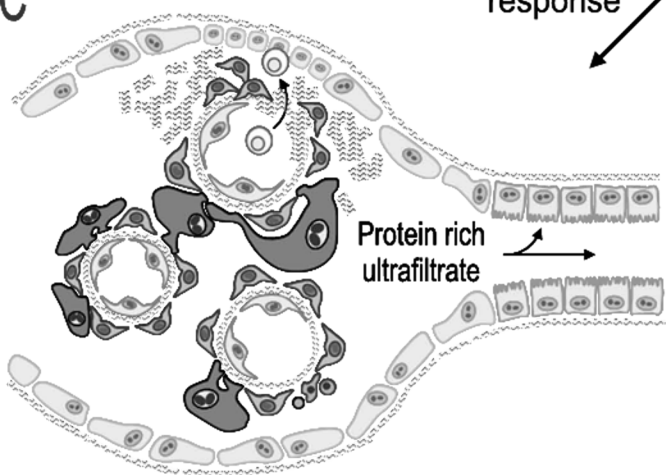

Degeneration and sclerosis

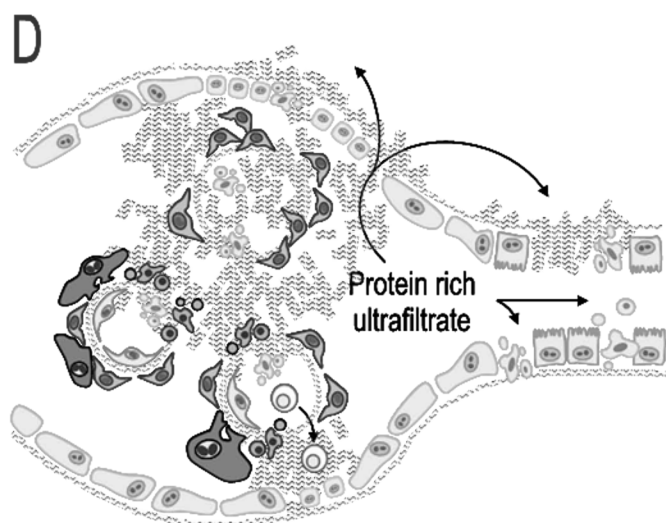

Supplement: MOESM4 [file 9577074]
